# Supplementary material for: Person-centred care in chronic kidney disease: a cross-sectional study of patients’ desires for self-management support
Source: Springer Nature journal article supplement (doi:10.1186/s12882-016-0416-2), 2017-01-13
Supplement: MOESM1 [file 11998314]

## Demographic Information

Please tick (✓)

|                                                                            |                                                                                            |
|----------------------------------------------------------------------------|--------------------------------------------------------------------------------------------|
| <b>Gender</b>                                                              | <input type="checkbox"/> Male <sup>1</sup><br><input type="checkbox"/> Female <sup>2</sup> |
| <b>Age</b>                                                                 | _____years                                                                                 |
| <b>Years of education</b>                                                  | _____years                                                                                 |
| <b>Highest educational qualification obtained</b>                          | <input type="checkbox"/> No Formal Education <sup>0</sup>                                  |
|                                                                            | <input type="checkbox"/> Less than Grade 10 Equivalent <sup>1</sup>                        |
|                                                                            | <input type="checkbox"/> Grade 10 or Equivalent <sup>2</sup>                               |
|                                                                            | <input type="checkbox"/> Grade 12 or Equivalent <sup>3</sup>                               |
|                                                                            | <input type="checkbox"/> TAFE Qualification/Certificate/Diploma <sup>4</sup>               |
|                                                                            | <input type="checkbox"/> Undergraduate Degree (Bachelors) <sup>5</sup>                     |
|                                                                            | <input type="checkbox"/> Masters Degree <sup>6</sup>                                       |
| <b>Employment Status</b>                                                   | <input type="checkbox"/> Unemployed <sup>0</sup>                                           |
|                                                                            | <input type="checkbox"/> Casual Work <sup>1</sup>                                          |
|                                                                            | <input type="checkbox"/> Part Time Work <sup>2</sup>                                       |
|                                                                            | <input type="checkbox"/> Full Time Work <sup>3</sup>                                       |
|                                                                            | <input type="checkbox"/> Retired <sup>4</sup>                                              |
|                                                                            | <input type="checkbox"/> Other (Describe) <sup>5</sup> :                                   |
| <b>Occupation (only complete if currently employed)</b>                    | Describe:                                                                                  |
| <b>Annual Household Income</b>                                             | <input type="checkbox"/> Less than \$20,000 <sup>0</sup>                                   |
|                                                                            | <input type="checkbox"/> \$20,000 – \$39,99 <sup>1</sup>                                   |
|                                                                            | <input type="checkbox"/> \$40,000 – \$59,999 <sup>2</sup>                                  |
|                                                                            | <input type="checkbox"/> \$60,000 – \$79,999 <sup>3</sup>                                  |
|                                                                            | <input type="checkbox"/> \$80,000 – \$99,999 <sup>4</sup>                                  |
|                                                                            | <input type="checkbox"/> \$100,000 – \$119,999 <sup>5</sup>                                |
|                                                                            | <input type="checkbox"/> \$120,000 + <sup>6</sup>                                          |
|                                                                            | <input type="checkbox"/> Don't know / Would rather not say <sup>7</sup>                    |
| <b>Approximately how long ago were you diagnosed with kidney problems?</b> | _____years _____months                                                                     |
|                                                                            | <input type="checkbox"/> Don't know                                                        |

The following section asks about the sort of self-management support you would like for your chronic kidney disease (CKD).

Please rate from **0 = Not at all** to **10 = Very much** how much you would like to learn about the following areas of self-management of your CKD. Please place a tick (✓) in the box that corresponds with your answer (see example, below).

**EXAMPLE:**

| 0<br><i>Not at all</i> | 1 | 2 | 3 | 4 | 5<br><i>Don't mind</i> | 6 | 7 | 8 | 9 | 10<br><i>Very much</i> |
|------------------------|---|---|---|---|------------------------|---|---|---|---|------------------------|
|                        |   |   |   | ✓ |                        |   |   |   |   |                        |

1. **CKD-specific knowledge** (e.g., information about what the kidneys do, how they function, what happens in CKD, treatment options, ways to delay dialysis, etc.):

| 0<br><i>Not at all</i> | 1 | 2 | 3 | 4 | 5<br><i>Don't mind</i> | 6 | 7 | 8 | 9 | 10<br><i>Very much</i> |
|------------------------|---|---|---|---|------------------------|---|---|---|---|------------------------|
|                        |   |   |   |   |                        |   |   |   |   |                        |

2. **Setting a routine and planning ahead**

(e.g., using reminder systems, getting into self-management habits):

| 0<br><i>Not at all</i> | 1 | 2 | 3 | 4 | 5<br><i>Don't mind</i> | 6 | 7 | 8 | 9 | 10<br><i>Very much</i> |
|------------------------|---|---|---|---|------------------------|---|---|---|---|------------------------|
|                        |   |   |   |   |                        |   |   |   |   |                        |

3. **Actively participating in healthcare** (e.g., learning to change self-management based upon results, working with doctors regarding disease and treatment):

| 0<br><i>Not at all</i> | 1 | 2 | 3 | 4 | 5<br><i>Don't mind</i> | 6 | 7 | 8 | 9 | 10<br><i>Very much</i> |
|------------------------|---|---|---|---|------------------------|---|---|---|---|------------------------|
|                        |   |   |   |   |                        |   |   |   |   |                        |

4. **Keeping a positive attitude and taking care of mental and general physical health**

(e.g., avoiding anxiety and depression, staying positive, staying physically healthy):

| 0<br><i>Not at all</i> | 1 | 2 | 3 | 4 | 5<br><i>Don't mind</i> | 6 | 7 | 8 | 9 | 10<br><i>Very much</i> |
|------------------------|---|---|---|---|------------------------|---|---|---|---|------------------------|
|                        |   |   |   |   |                        |   |   |   |   |                        |

5. **Changing lifestyle** (e.g., sticking to your fluid and dietary guidelines, exercising):

| 0<br><i>Not at all</i> | 1 | 2 | 3 | 4 | 5<br><i>Don't mind</i> | 6 | 7 | 8 | 9 | 10<br><i>Very much</i> |
|------------------------|---|---|---|---|------------------------|---|---|---|---|------------------------|
|                        |   |   |   |   |                        |   |   |   |   |                        |

6. **Managing medications** (e.g., understanding why they're prescribed, side effects you might have, what might happen if you do not take them, taking them as prescribed):

| 0<br><i>Not at all</i> | 1 | 2 | 3 | 4 | 5<br><i>Don't mind</i> | 6 | 7 | 8 | 9 | 10<br><i>Very much</i> |
|------------------------|---|---|---|---|------------------------|---|---|---|---|------------------------|
|                        |   |   |   |   |                        |   |   |   |   |                        |

7. **Noticing and treating signs related to CKD** (e.g., noticing symptoms of CKD and knowing how to treat them, knowing what causes symptoms):

| 0<br><i>Not at all</i> | 1 | 2 | 3 | 4 | 5<br><i>Don't mind</i> | 6 | 7 | 8 | 9 | 10<br><i>Very much</i> |
|------------------------|---|---|---|---|------------------------|---|---|---|---|------------------------|
|                        |   |   |   |   |                        |   |   |   |   |                        |

8. **Keeping social and occupational roles**  
(e.g., continuing to work, continuing hobbies, sustaining relationships and home roles):

| 0<br><i>Not at all</i> | 1 | 2 | 3 | 4 | 5<br><i>Don't mind</i> | 6 | 7 | 8 | 9 | 10<br><i>Very much</i> |
|------------------------|---|---|---|---|------------------------|---|---|---|---|------------------------|
|                        |   |   |   |   |                        |   |   |   |   |                        |

9. **Getting social support** (e.g., support from family and friends, getting involved with community groups such as support groups):

| 0<br><i>Not at all</i> | 1 | 2 | 3 | 4 | 5<br><i>Don't mind</i> | 6 | 7 | 8 | 9 | 10<br><i>Very much</i> |
|------------------------|---|---|---|---|------------------------|---|---|---|---|------------------------|
|                        |   |   |   |   |                        |   |   |   |   |                        |

10. **How to build good relationships with your health care providers**  
(e.g., doctors, nurses, clinic staff, allied health professionals):

| 0<br><i>Not at all</i> | 1 | 2 | 3 | 4 | 5<br><i>Don't mind</i> | 6 | 7 | 8 | 9 | 10<br><i>Very much</i> |
|------------------------|---|---|---|---|------------------------|---|---|---|---|------------------------|
|                        |   |   |   |   |                        |   |   |   |   |                        |

11. Are there any other areas of self-management that you would like to learn more about?  
(Describe)

---



---



---



---



---

Please label the topics below from 1 to 11 to indicate how much you would like to learn about each option.

**1 = the topic you would like to learn about the MOST**

**11 = the topic you would like to learn about the LEAST**

| TOPIC                                                                              | RATING |
|------------------------------------------------------------------------------------|--------|
| Noticing and treating signs related to CKD                                         |        |
| Changing your lifestyle to help your CKD                                           |        |
| Keeping your social and occupational roles, despite your CKD                       |        |
| Building good relationships with your healthcare providers (e.g., doctors, nurses) |        |
| Learning more about your kidneys and about CKD                                     |        |
| Being an active participant in your healthcare                                     |        |
| Getting support from friends and family                                            |        |
| Getting into good routines to help manage your CKD                                 |        |
| Keeping a positive attitude and looking after your mental and physical health      |        |
| How to manage medications                                                          |        |
| Other (Describe:<br>_____<br>_____ )                                               |        |

**Thank you!**

**We have just a few more questions for you about your preferences for receiving self-management support.**

1. When (in the week) would you be able to attend sessions of a self-management program?  
(Tick as many as apply)

- During the week during the day (between the hours of 9am and 5pm)<sup>1</sup>
- During the week in the evening (after 5pm)<sup>2</sup>
- On weekends<sup>3</sup>

2. Where would you be willing to attend sessions of a self-management program?  
(Tick as many as apply)

- Outside your home (e.g., at the clinic)<sup>1</sup>
- At home<sup>2</sup>

3. How would you like the face-to-face self-management program to be run?  
(Tick one option)

- Individually (one-on-one with expert)<sup>1</sup>
- Group (with others with CKD + expert)<sup>2</sup>
- No preference<sup>3</sup>

4. Would you like for a friend or family member to attend the program with you?  
(Tick one option)

- Yes<sup>1</sup>
- No<sup>2</sup>
- Wouldn't mind<sup>3</sup>

5. Who would you like to help you learn about self-management?  
(Tick as many as apply)

- Your normal doctor (GP)<sup>1</sup>
- A nephrologist (kidney specialist doctor)<sup>2</sup>
- A nurse<sup>3</sup>
- An expert in CKD self-management<sup>4</sup>
- Other<sup>5</sup> (detail: \_\_\_\_\_)
- No preference<sup>6</sup>

6. Do you have any other suggestions for how you think a self-management program for CKD should be run? (Please describe)

---

---

---

---

---

---

**Thank you! Your participation is greatly appreciated. 😊**
